# Supplementary material for: Facile synthesis of silver nanocatalyst decorated Fe3O4@PDA core–shell nanoparticles with enhanced catalytic properties and selectivity
Source: Royal Society of Chemistry journal article supplement (doi:10.1039/d1ra09187e), 2022-01-01
Supplement: d1ra09187e1.pdf [file d1ra09187e1.pdf]

## Facile Synthesis of silver nanocatalysts decorated $\text{Fe}_3\text{O}_4@\text{PDA}$ core-shell nanoparticles with enhanced catalytic property and selectivity

Yujie Liu<sup>a</sup>, Haijun Zhou<sup>\*a</sup>, Jinling Wang<sup>a</sup>, Ding Yu<sup>a</sup>, Zhaolei Li<sup>a</sup>, Rui Liu<sup>\*b</sup>

<sup>a</sup>School of Materials Science and Engineering, Jiangsu University of Science and Technology, Zhenjiang, 212100, China

<sup>b</sup>Ministry of Education Key Laboratory of Advanced Civil Engineering Materials, School of Materials Science and Engineering, Tongji University, Shanghai, 201804, China

\*: to whom the correspondence should be addressed

[zhouhaijun@just.edu.cn](mailto:zhouhaijun@just.edu.cn)(H. Zhou), [rui.liu@tongji.edu.cn](mailto:rui.liu@tongji.edu.cn)(R. Liu)

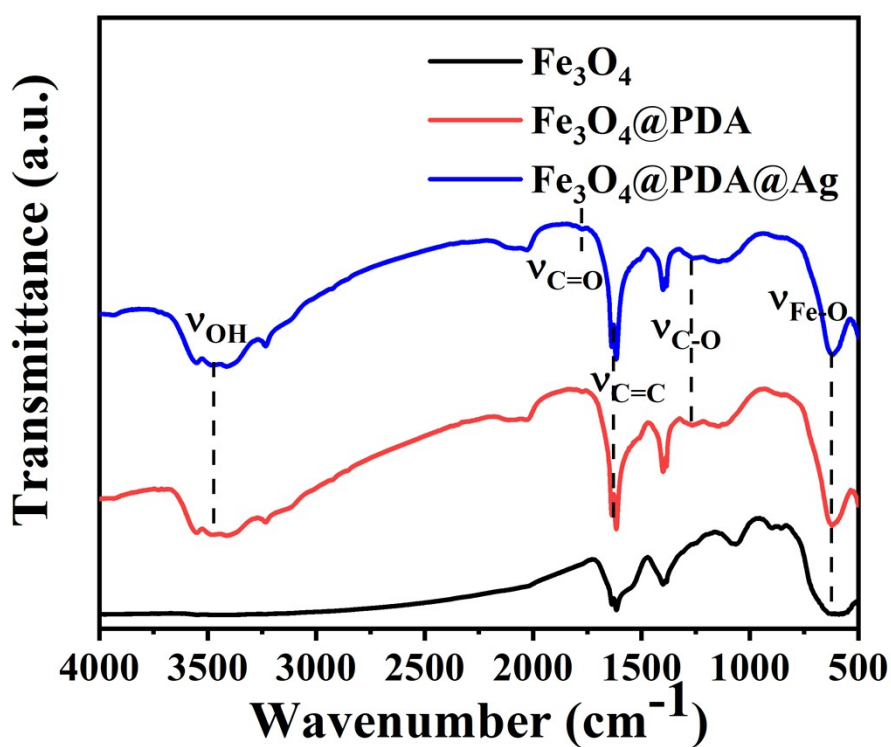

Fig. S1. FT-IR spectra of  $\text{Fe}_3\text{O}_4$ ,  $\text{Fe}_3\text{O}_4@\text{PDA}$  and  $\text{Fe}_3\text{O}_4@\text{PDA}@\text{Ag}$ .

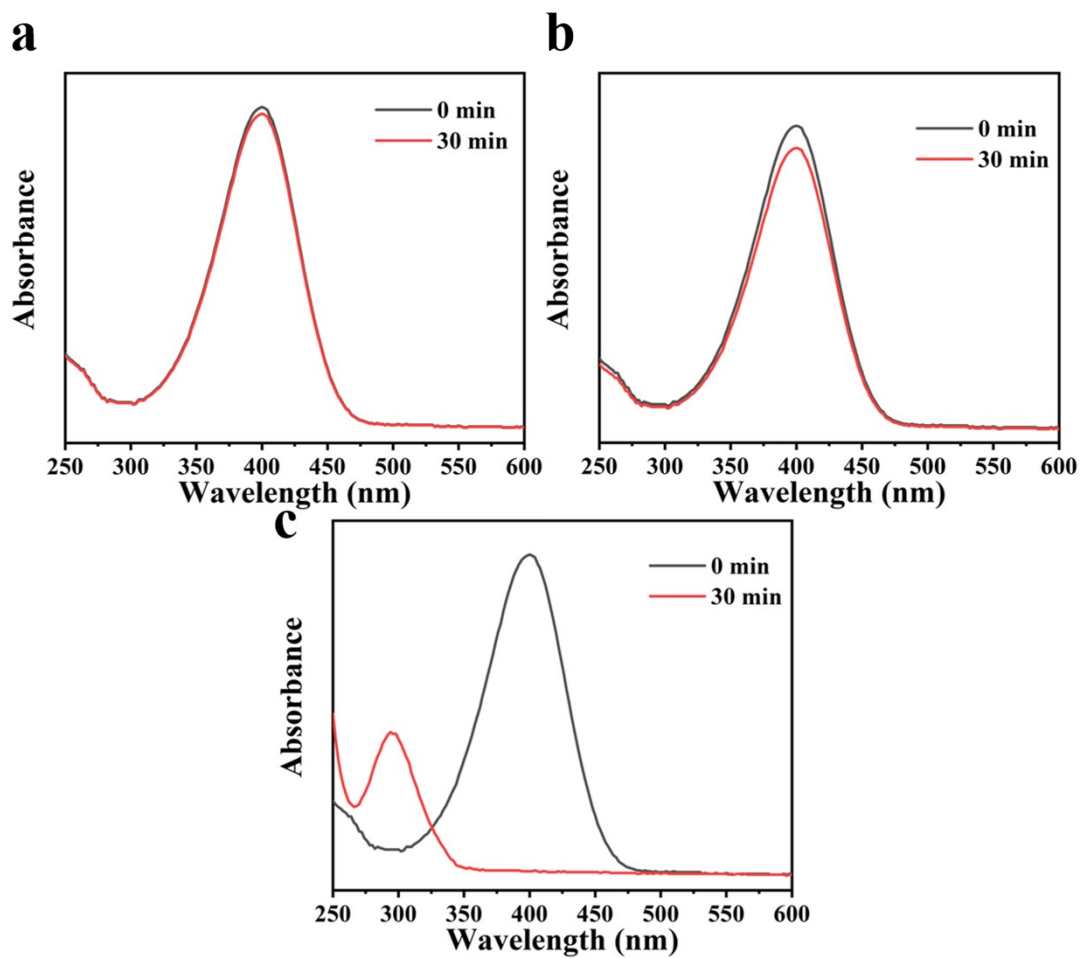

**Fig. S2.** UV-vis of reaction solution using a) Fe<sub>3</sub>O<sub>4</sub>. b) Fe<sub>3</sub>O<sub>4</sub>@PDA. c) Fe<sub>3</sub>O<sub>4</sub>@PDA@Ag as a catalyst

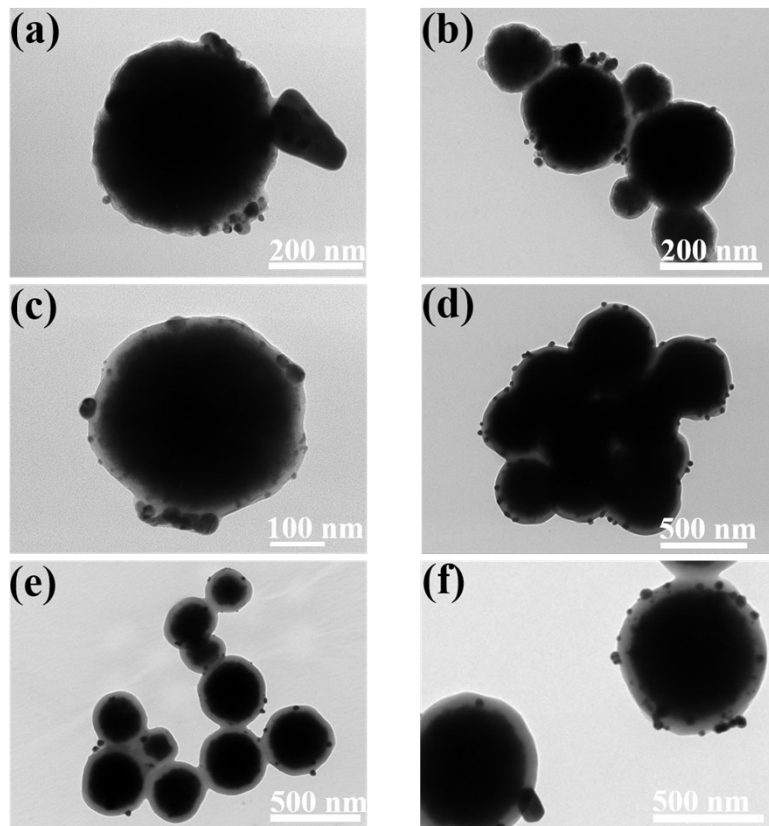

**Fig. S3.** TEM. a)  $\text{Fe}_3\text{O}_4@\text{PDA}@\text{Ag}$  1:1-0.5 mM b)  $\text{Fe}_3\text{O}_4@\text{PDA}@\text{Ag}$  1:1-1 mM c)  $\text{Fe}_3\text{O}_4@\text{PDA}@\text{Ag}$  1:2-0.5 mM d)  $\text{Fe}_3\text{O}_4@\text{PDA}@\text{Ag}$  1:2-1 mM e)  $\text{Fe}_3\text{O}_4@\text{PDA}@\text{Ag}$  1:3-0.5 mM a)  $\text{Fe}_3\text{O}_4@\text{PDA}@\text{Ag}$  1:3-1 mM.
